# Supplementary material for: Using GAM functions and Markov-Switching models in an evaluation framework to assess countries’ performance in controlling the COVID-19 pandemic
Source: Springer Nature journal article supplement (doi:10.1186/s12889-021-11891-6), 2021-11-27
Supplement: MOESM4 [file 19906834]

## List of countries' abbreviations

| Country                         | iso3c | Country                      | iso3c |
|---------------------------------|-------|------------------------------|-------|
| Afghanistan                     | AFG   | Czechia                      | CZE   |
| Albania                         | ALB   | Democratic Republic of Congo | COD   |
| Algeria                         | DZA   | Denmark                      | DNK   |
| Andorra                         | AND   | Djibouti                     | DJI   |
| Angola                          | AGO   | Dominica                     | DMA   |
| Anguilla                        | AIA   | Dominican Republic           | DOM   |
| Antigua and Barbuda             | ATG   | Ecuador                      | ECU   |
| Argentina                       | ARG   | Egypt                        | EGY   |
| Armenia                         | ARM   | El Salvador                  | SLV   |
| Aruba                           | ABW   | Equatorial Guinea            | GNQ   |
| Australia                       | AUS   | Estonia                      | EST   |
| Austria                         | AUT   | Eswatini                     | SWZ   |
| Azerbaijan                      | AZE   | Ethiopia                     | ETH   |
| Bahamas                         | BHS   | Faeroe Islands               | FRO   |
| Bahrain                         | BHR   | Fiji                         | FJI   |
| Bangladesh                      | BGD   | Finland                      | FIN   |
| Barbados                        | BRB   | France                       | FRA   |
| Belarus                         | BLR   | French Polynesia             | PYF   |
| Belgium                         | BEL   | Gabon                        | GAB   |
| Belize                          | BLZ   | Gambia                       | GMB   |
| Benin                           | BEN   | Georgia                      | GEO   |
| Bermuda                         | BMU   | Germany                      | DEU   |
| Bhutan                          | BTN   | Ghana                        | GHA   |
| Bolivia                         | BOL   | Gibraltar                    | GIB   |
| Bonaire Sint Eustatius and Saba | BES   | Greece                       | GRC   |
| Bosnia and Herzegovina          | BIH   | Greenland                    | GRL   |
| Botswana                        | BWA   | Grenada                      | GRD   |
| Brazil                          | BRA   | Guatemala                    | GTM   |
| British Virgin Islands          | VGB   | Guernsey                     | GGY   |
| Brunei                          | BRN   | Guinea                       | GIN   |
| Bulgaria                        | BGR   | Guinea-Bissau                | GNB   |
| Burkina Faso                    | BFA   | Guyana                       | GUY   |
| Cambodia                        | KHM   | Honduras                     | HND   |
| Cameroon                        | CMR   | Hong Kong                    | HKG   |
| Canada                          | CAN   | Hungary                      | HUN   |
| Cape Verde                      | CPV   | Iceland                      | ISL   |
| Cayman Islands                  | CYM   | India                        | IND   |
| Central African Republic        | CAF   | Indonesia                    | IDN   |
| Chile                           | CHL   | Iran                         | IRN   |
| China                           | CHN   | Iraq                         | IRQ   |
| Colombia                        | COL   | Ireland                      | IRL   |
| Comoros                         | COM   | Isle of Man                  | IMN   |
| Congo                           | COG   | Israel                       | ISR   |
| Costa Rica                      | CRI   | Italy                        | ITA   |
| Cote d'Ivoire                   | CIV   | Jamaica                      | JAM   |
| Croatia                         | HRV   | Japan                        | JPN   |
| Cuba                            | CUB   | Jersey                       | JEY   |
| Curacao                         | CUW   | Jordan                       | JOR   |
| Cyprus                          | CYP   | Kazakhstan                   | KAZ   |

## List of countries' abbreviations

| Country          | iso3c    | Country                          | iso3c |
|------------------|----------|----------------------------------|-------|
| Kenya            | KEN      | Peru                             | PER   |
| Kiribati         | KIR      | Philippines                      | PHL   |
| Kuwait           | KWT      | Poland                           | POL   |
| Kyrgyzstan       | KGZ      | Portugal                         | PRT   |
| Laos             | LAO      | Qatar                            | QAT   |
| Latvia           | LVA      | Romania                          | ROU   |
| Lebanon          | LBN      | Russia                           | RUS   |
| Lesotho          | LSO      | Rwanda                           | RWA   |
| Liberia          | LBR      | Saint Kitts and Nevis            | KNA   |
| Libya            | LBY      | Saint Lucia                      | LCA   |
| Liechtenstein    | LIE      | Saint Vincent and the Grenadines | VCT   |
| Lithuania        | LTU      | Samoa                            | WSM   |
| Luxembourg       | LUX      | San Marino                       | SMR   |
| Macao            | MAC      | Sao Tome and Principe            | STP   |
| Madagascar       | MDG      | Saudi Arabia                     | SAU   |
| Malawi           | MWI      | Senegal                          | SEN   |
| Malaysia         | MYS      | Serbia                           | SRB   |
| Maldives         | MDV      | Seychelles                       | SYC   |
| Mali             | MLI      | Sierra Leone                     | SLE   |
| Malta            | MLT      | Singapore                        | SGP   |
| Mauritania       | MRT      | Sint Maarten (Dutch part)        | SXM   |
| Mauritius        | MUS      | Slovakia                         | SVK   |
| Mexico           | MEX      | Slovenia                         | SVN   |
| Moldova          | MDA      | Solomon Islands                  | SLB   |
| Monaco           | MCO      | Somalia                          | SOM   |
| Mongolia         | MNG      | South Africa                     | ZAF   |
| Montenegro       | MNE      | South Korea                      | KOR   |
| Montserrat       | MSR      | South Sudan                      | SSD   |
| Morocco          | MAR      | Spain                            | ESP   |
| Mozambique       | MOZ      | Sri Lanka                        | LKA   |
| Myanmar          | MMR      | Sudan                            | SDN   |
| Namibia          | NAM      | Suriname                         | SUR   |
| Nauru            | NRU      | Sweden                           | SWE   |
| Nepal            | NPL      | Switzerland                      | CHE   |
| Netherlands      | NLD      | Syria                            | SYR   |
| New Caledonia    | NCL      | Taiwan                           | TWN   |
| New Zealand      | NZL      | Tajikistan                       | TJK   |
| Nicaragua        | NIC      | Thailand                         | THA   |
| Niger            | NER      | Togo                             | TGO   |
| Nigeria          | NGA      | Tonga                            | TON   |
| North Macedonia  | MKD      | Trinidad and Tobago              | TTO   |
| Northern Cyprus  | OWID_CYN | Tunisia                          | TUN   |
| Norway           | NOR      | Turkey                           | TUR   |
| Oman             | OMN      | Turks and Caicos Islands         | TCA   |
| Pakistan         | PAK      | Tuvalu                           | TUV   |
| Palestine        | PSE      | Uganda                           | UGA   |
| Panama           | PAN      | Ukraine                          | UKR   |
| Papua New Guinea | PNG      | United Arab Emirates             | ARE   |
| Paraguay         | PRY      | United Kingdom                   | GBR   |

## List of countries' abbreviations

| <b>Country</b>    | <b>iso3c</b> | <b>Country</b> | <b>iso3c</b> |
|-------------------|--------------|----------------|--------------|
| United States     | USA          |                |              |
| Uruguay           | URY          |                |              |
| Uzbekistan        | UZB          |                |              |
| Vanuatu           | VUT          |                |              |
| Venezuela         | VEN          |                |              |
| Vietnam           | VNM          |                |              |
| Wallis and Futuna | WLF          |                |              |
| Yemen             | YEM          |                |              |
| Zambia            | ZMB          |                |              |
| Zimbabwe          | ZWE          |                |              |
